# Supplementary material for: Intersection of DNA Repair Pathways and the Immune Landscape Identifies PD-L2 as a Prognostic Marker in Epithelial Ovarian Cancer
Source: MDPI journal article supplement (doi:10.3390/cancers13081972), 2021-04-20
Supplement: s1 [file s1]

# Supplementary Materials: Intersection of DNA Repair Pathways and the Immune Landscape Identifies PD-L2 as a Prognostic Marker in Epithelial Ovarian Cancer

Samantha Batman, Koji Matsuo, Paulette Mhawech-Fauceglia, Elizabeth Munro, Mercedes Weisenberger, Allison Allen, Sonali Joshi, Hiroko Machida, Shinya Matsuzaki, Tatjana Bozanovic and Tanja Pejovic

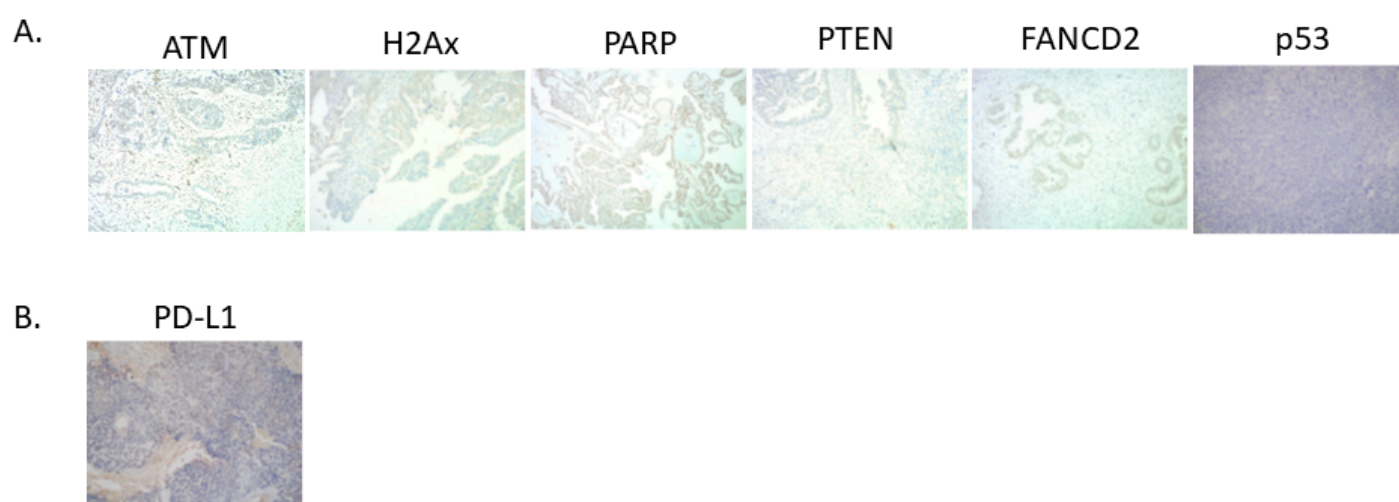

**Figure S1.** Weak/negative expression of DNA repair and Immune checkpoint markers in epithelial ovarian tumors. Representative weak/negative immunohistochemistry staining of (A) DNA repair (ATM, H2Ax, PARP, PTEN, FANCD2, p53) and (B) immune markers (PD-L1) in a tissue microarray with clinically annotated ovarian tumor tissue.

**Table S1.** Cutoff values for biomarkers (progression-free survival).

| IHC Cutoff | 0 vs. 1+/2+/3+ | 0/1+ vs. 2+/3+ | 0/1+/2+ vs. 3+ | Final Cutoff Chosen for Survival Analysis |
|------------|----------------|----------------|----------------|-------------------------------------------|
| PARP       | Log-rank 0.165 | Log-rank 1.947 | Log-rank 0.284 | 0/1+ vs. 2+/3+                            |
| ATM        | Log-rank 0.100 | Log-rank 0.445 | Log-rank 1.233 | 0/1+/2+ vs. 3+                            |
| H2Ax       | Log-rank 1.246 | Log-rank 0.202 | Log-rank 1.057 | 0 vs. 1+/2+/3+                            |
| PTEN       | Log-rank 0.025 | Log-rank 1.974 | Log-rank 0.161 | 0/1+ vs. 2+/3+                            |
| FANCD2     | Log-rank 0.061 | Log-rank 0.040 | Log-rank 1.797 | 0/1+/2+ vs. 3+                            |
| PD-L1      | Log-rank 0.114 | Log-rank 2.625 | Log-rank 1.281 | 0/1+ vs. 2+/3+                            |
| PD-L2      | Log-rank 2.675 | Log-rank 1.796 | Log-rank 0.055 | 0 vs. 1+/2+/3+                            |

  

| Cell Counts | 0 vs. 1 <sup>st</sup> -T/2 <sup>nd</sup> -T/3 <sup>rd</sup> -T | 0/1 <sup>st</sup> -T vs. 2 <sup>nd</sup> -T/3 <sup>rd</sup> -T | 0/1 <sup>st</sup> -T/2 <sup>nd</sup> -T vs. 3 <sup>rd</sup> -T | Final Cutoff Chosen for Survival Analysis                      |
|-------------|----------------------------------------------------------------|----------------------------------------------------------------|----------------------------------------------------------------|----------------------------------------------------------------|
| CD4         | Log-rank 2.864                                                 | Log-rank 0.100                                                 | Log-rank 0.021                                                 | 0 vs. 1 <sup>st</sup> -T/2 <sup>nd</sup> -T/3 <sup>rd</sup> -T |
| CD8         | Log-rank 0.974                                                 | Log-rank 1.469                                                 | Log-rank 2.362                                                 | 0/1 <sup>st</sup> -T/2 <sup>nd</sup> -T vs. 3 <sup>rd</sup> -T |
| CD68        | Log-rank 0.087                                                 | Log-rank 0.383                                                 | Log-rank 0.177                                                 | 0/1 <sup>st</sup> -T vs. 2 <sup>nd</sup> -T/3 <sup>rd</sup> -T |
| FOXP3       | Log-rank 0.275                                                 | Log-rank 1.571                                                 | Log-rank 1.272                                                 | 0/1 <sup>st</sup> -T vs. 2 <sup>nd</sup> -T/3 <sup>rd</sup> -T |

For the biomarkers that scored via immunohistochemistry (PARP, ATM, H2Ax, PTEN, FANCD2, PD-L1, and PD-L2) as 0, 1+, 2+, or 3+, we have modeled the tested biomarkers as the following 3 patterns: 0 vs. 1+/2+/3+; 0/1+ vs. 2+/3+; and 0, 1+, 2+ vs. 3+. In each cutoff, log-rank test was performed for progression-free survival, and the statistical values are displayed in the table. Among the 3 cutoffs tested, the cutoff demonstrating the largest statistical value was chosen for the further survival analysis. For the biomarkers that scored as cell counts (CD4, CD8, CD68, and FOXP3), the cell counts among expressed were trisected as 1-33%ile (1<sup>st</sup>-T), 34-66%ile (2<sup>nd</sup>-T), and 67-100%ile (3<sup>rd</sup>-T). We have modeled the tested biomarkers as the following 3 patterns: 0 vs. 1<sup>st</sup>-T/2<sup>nd</sup>-T/3<sup>rd</sup>-T; 0/1<sup>st</sup>-T vs. 2<sup>nd</sup>-T/3<sup>rd</sup>-T; and 0/1<sup>st</sup>-T/2<sup>nd</sup>-T vs. 3<sup>rd</sup>-T. In each cutoff, Log-rank test was performed for progression-free survival, and the statistical values are displayed in the table. Among the 3 cutoffs tested, the cutoff demonstrating the largest statistical value was chosen for the further survival analysis.

**Table S2.** Cutoff values for biomarkers (overall survival).

| IHC Cutoff | 0 vs. 1+/2+/3+ | 0/1+ vs. 2+/3+ | 0/1+/2+ vs. 3+ | Final Cutoff Chosen for Survival Analysis |
|------------|----------------|----------------|----------------|-------------------------------------------|
| PARP       | Log-rank 0.031 | Log-rank 0.075 | Log-rank 0.021 | 0/1+ vs. 2+/3+                            |
| ATM        | Log-rank 0.071 | Log-rank 0.545 | Log-rank 0.333 | 0/1+ vs. 2+/3+                            |
| H2Ax       | Log-rank 2.144 | Log-rank 0.103 | Log-rank 0.684 | 0 vs. 1+/2+/3+                            |
| PTEN       | Log-rank 0.001 | Log-rank 0.385 | Log-rank 0.168 | 0/1+ vs. 2+/3+                            |
| FANC       | Log-rank 1.093 | Log-rank 0.153 | Log-rank 1.905 | 0/1+/2+ vs. 3+                            |
| PD-L1      | Log-rank 0.775 | Log-rank 1.974 | Log-rank 1.698 | 0/1+ vs. 2+/3+                            |
| PD-L2      | Log-rank 0.004 | Log-rank 0.025 | Log-rank 1.059 | 0 vs. 1+/2+/3+                            |

| Cell Counts | 0 vs. 1 <sup>st</sup> -T/2 <sup>nd</sup> -T/3 <sup>rd</sup> -T | 0/1 <sup>st</sup> -T vs. 2 <sup>nd</sup> -T/3 <sup>rd</sup> -T | 0/1 <sup>st</sup> -T/2 <sup>nd</sup> -T vs. 3 <sup>rd</sup> -T | Final Cutoff Chosen for Survival Analysis                      |
|-------------|----------------------------------------------------------------|----------------------------------------------------------------|----------------------------------------------------------------|----------------------------------------------------------------|
| CD4         | Log-rank 0.512                                                 | Log-rank 0.008                                                 | Log-rank 0.016                                                 | 0 vs. 1 <sup>st</sup> -T/2 <sup>nd</sup> -T/3 <sup>rd</sup> -T |
| CD8         | Log-rank 3.951                                                 | Log-rank 1.057                                                 | Log-rank 1.521                                                 | 0 vs. 1 <sup>st</sup> -T/2 <sup>nd</sup> -T/3 <sup>rd</sup> -T |
| CD68        | Log-rank 0.000                                                 | Log-rank 0.171                                                 | Log-rank 0.690                                                 | 0/1 <sup>st</sup> -T/2 <sup>nd</sup> -T vs. 3 <sup>rd</sup> -T |
| FOXP3       | Log-rank 0.430                                                 | Log-rank 2.834                                                 | Log-rank 2.552                                                 | 0/1 <sup>st</sup> -T vs. 2 <sup>nd</sup> -T/3 <sup>rd</sup> -T |

For the biomarkers that scored via immunohistochemistry (PARP, ATM, H2Ax, PTEN, FANC, PD-L1, and PD-L2) as 0, 1+, 2+, or 3+, we have modeled the tested biomarkers as the following 3 patterns: 0 vs. 1+/2+/3+; 0/1+ vs. 2+/3+; and 0, 1+, 2+ vs 3+. In each cutoff, Log-rank test was performed for overall survival, and the statistical values are displayed in the table. Among the 3 cutoffs tested, the cutoff demonstrating the largest statistical value was chosen for the further survival analysis. For the biomarkers that scored as cell counts (CD4, CD8, CD68, and FOXP3), the cell counts among expressed were trisected as 1-33%ile (1<sup>st</sup>-T), 34-66%ile (2<sup>nd</sup>-T), and 67-100%ile (3<sup>rd</sup>-T). We have modeled the tested biomarkers as the following 3 patterns: 0 vs 1<sup>st</sup>-T/2<sup>nd</sup>-T/3<sup>rd</sup>-T; 0/1<sup>st</sup>-T vs 2<sup>nd</sup>-T/3<sup>rd</sup>-T; and 0/1<sup>st</sup>-T/2<sup>nd</sup>-T vs 3<sup>rd</sup>-T. In each cutoff, Log-rank test was performed for overall survival, and the statistical values are displayed in the table. Among the 3 cutoffs tested, the cutoff demonstrating the largest statistical value was chosen for the further survival analysis.

**Table S3.** Correlation for pathological factors among high-grade serous carcinoma ( $n = 141$ ).

|       | No. | p53  | PARP             | ATM              | H2Ax         | PTEN         | FANC             | CD4              | CD8              | CD68             | FOXP3       | PD-L1       | PD-L2       |
|-------|-----|------|------------------|------------------|--------------|--------------|------------------|------------------|------------------|------------------|-------------|-------------|-------------|
| p53   | 138 |      | 0.06             | 0.04             | 0.01         | 0.01         | 0.07             | 0.08             | 0.03             | 0.10             | 0.01        | 0.11        | 0.07        |
| PARP  | 141 | 0.51 |                  | <b>0.41</b>      | 0.10         | 0.04         | <b>0.33</b>      | <b>0.22</b>      | 0.12             | 0.01             | 0.05        | <b>0.53</b> | 0.03        |
| ATM   | 135 | 0.66 | <b>&lt;0.001</b> |                  | 0.15         | 0.16         | <b>0.25</b>      | 0.04             | <b>0.32</b>      | <b>0.24</b>      | <b>0.19</b> | <b>0.29</b> | 0.11        |
| H2Ax  | 136 | 0.96 | 0.25             | 0.09             |              | <b>0.17</b>  | 0.10             | 0.01             | 0.01             | 0.04             | 0.03        | 0.09        | 0.11        |
| PTEN  | 137 | 0.99 | 0.67             | 0.07             | <b>0.048</b> |              | 0.06             | 0.05             | 0.06             | 0.09             | 0.02        | <b>0.20</b> | 0.02        |
| FANC  | 136 | 0.39 | <b>&lt;0.001</b> | <b>0.004</b>     | 0.23         | 0.51         |                  | 0.07             | 0.12             | 0.02             | 0.02        | <b>0.30</b> | 0.02        |
| CD4   | 136 | 0.34 | <b>0.011</b>     | 0.68             | 0.98         | 0.55         | 0.39             |                  | <b>0.42</b>      | <b>0.46</b>      | <b>0.43</b> | 0.07        | 0.03        |
| CD8   | 134 | 0.74 | 0.16             | <b>&lt;0.001</b> | 0.92         | 0.51         | 0.17             | <b>&lt;0.001</b> |                  | <b>0.48</b>      | <b>0.53</b> | 0.15        | 0.16        |
| CD68  | 131 | 0.26 | 0.93             | <b>0.006</b>     | 0.66         | 0.28         | 0.84             | <b>&lt;0.001</b> | <b>&lt;0.001</b> |                  | <b>0.56</b> | 0.16        | <b>0.17</b> |
| FOXP3 | 135 | 0.96 | 0.58             | <b>0.030</b>     | 0.73         | 0.81         | 0.80             | <b>&lt;0.001</b> | <b>&lt;0.001</b> | <b>&lt;0.001</b> |             | 0.08        | 0.11        |
| PD-L1 | 138 | 0.22 | <b>&lt;0.001</b> | <b>0.001</b>     | 0.31         | <b>0.018</b> | <b>&lt;0.001</b> | 0.43             | 0.09             | 0.062            | 0.36        |             | 0.10        |
| PD-L2 | 135 | 0.41 | 0.72             | 0.20             | 0.21         | 0.82         | 0.80             | 0.78             | 0.064            | <b>0.048</b>     | 0.22        | 0.24        |             |

Spearman's correlation coefficient for  $p$ -values (right upper half shows R values, and left lower half shows  $p$ -values). Significant  $p$ -values ( $p < 0.05$ ) are emboldened.
